# Supplementary material for: Investigation of the Exposure of Schoolchildren to Ultrafine Particles (PM0.1) during the COVID-19 Pandemic in a Medium-Sized City in Indonesia
Source: MDPI journal article supplement (doi:10.3390/ijerph20042947), 2023-02-08
Supplement: s1 [file s1]

## Supplementary Information (SI)

This supplementary information includes:

Equation (S1) to (S5)

Table S1 to S4

The respiratory deposition doses (RDDs) can be evaluated by:

$$RDD = DF_i \times (VT \times f) \times PM_i \quad (S1)$$

where  $VT$  is a tidal volume ( $\text{m}^3 \text{ breathe}^{-1}$ ),  $f$  is the typical breath frequency ( $\text{breath min}^{-1}$ ),  $PM_i$  is the mass concentration of a size fraction  $I$ , and  $DF_{ij}$  is deposition fraction of a size fraction  $i$  and region  $j$ , e.g., head airways ( $DF_{HD}$ ), tracheobronchial ( $DF_{TB}$ ) and alveolar ( $DF_{AL}$ ) regions.

The deposition fraction for the head airways region ( $DF_{HD}$ ) was calculated as follows:

$$DF_{HD} = IF \left( \frac{1}{1 + \exp(6.84 + 1.183 \ln d_p)} + \frac{1}{1 + \exp(0.924 - 1.885 \ln d_p)} \right) \quad (S2)$$

where  $d_p$  is the particle size in  $\mu\text{m}$ , while  $IF$  is the inhalable fraction calculated by:

$$IF = 1 - 0.5 \left( 1 - \frac{1}{1 + 0.00076 d_p^{2.8}} \right) \quad (S3)$$

The deposition fraction for the tracheobronchial region,  $DF_{TB}$ , was determined by:

$$DF_{TB} = \left( \frac{0.00352}{d_p} \right) \left[ \exp(-0.234(\ln d_p + 3.40)^2) + 63.9 \exp(-0.819(\ln d_p - 1.61)^2) \right] \quad (S4)$$

The deposition fraction for the alveolar region,  $DF_{AL}$ , was estimated by:

$$DF_{AL} = \left( \frac{0.0155}{d_p} \right) \left[ \exp(-0.416(\ln d_p + 2.84)^2) + 19.11 \exp(-0.482(\ln d_p - 1.362)^2) \right] \quad (S5)$$

**Table S1.** Description of schoolchildren participants for personal exposure measurement.

| Student's<br>origin | sex |      | home position    |               |                   | house<br>occupant<br>(people) |     | cooking duration/day<br>(hour) |     |     |    | Smoking's<br>at home |    | way to school |                 |
|---------------------|-----|------|------------------|---------------|-------------------|-------------------------------|-----|--------------------------------|-----|-----|----|----------------------|----|---------------|-----------------|
|                     | boy | girl | near<br>roadside | small<br>road | housing<br>estate | 3-4                           | 5-8 | <1                             | 1-2 | 3-4 | ≥5 | yes                  | no | car           | motor-<br>cycle |
| Urban schools       |     |      |                  |               |                   |                               |     |                                |     |     |    |                      |    |               |                 |
| U1                  | 3   | 2    | -                | 2             | 3                 | 3                             | 2   | -                              | 1   | 2   | 2  | 4                    | 1  | 3             | 2               |
| U2                  | 1   | 7    | -                | 8             | -                 | 5                             | 3   | 1                              | 3   | 2   | 2  | 4                    | 4  | -             | 8               |
| U3                  | 2   | 4    | 2                | 4             | -                 | 3                             | 3   | 1                              | 3   | 2   | -  | 4                    | 2  | -             | 6               |
| Total               | 6   | 13   | 2                | 14            | 3                 | 11                            | 8   | 2                              | 7   | 6   | 4  | 12                   | 7  | 3             | 16              |
| Suburban schools    |     |      |                  |               |                   |                               |     |                                |     |     |    |                      |    |               |                 |
| SU1                 | 3   | 5    | 1                | 6             | 1                 | 7                             | 1   | -                              | -   | 4   | 4  | 5                    | 3  | -             | 8               |
| SU2                 | -   | 7    | 1                | 1             | 5                 | 4                             | 3   | -                              | 1   | 2   | 4  | 6                    | 1  | -             | 7               |
| Total               | 3   | 12   | 2                | 7             | 6                 | 11                            | 4   | 0                              | 1   | 6   | 8  | 11                   | 4  | 0             | 15              |
| TOTAL               | 9   | 25   | 4                | 21            | 9                 | 22                            | 12  | 2                              | 8   | 12  | 12 | 23                   | 11 | 3             | 31              |

**Table S2.** Types of statistical tests used for data analyses.

| <b>Types of statistical</b> |                      |                     |                                                                                                                                                                                  |
|-----------------------------|----------------------|---------------------|----------------------------------------------------------------------------------------------------------------------------------------------------------------------------------|
| <b>No</b>                   | <b>analysis</b>      |                     | <b>description</b>                                                                                                                                                               |
| 1                           | Parametric tests     | ANOVA               | Comparison of schoolchildren's exposure to $PM_{<0.1}$ , $PM_{0.1-0.4}$ , and $PM_{0.4-1.0}$ based on their school origin and between their area of living (urban and suburban). |
|                             |                      | Post-hoc test       | Comparison details for the most significantly different of schoolchildren's exposure to $PM_{<0.1}$ and $PM_{0.1-0.4}$ following ANOVA result test based on their school origin. |
| 2                           | Non-parametric tests | Kruskal-Wallis test | Comparison of schoolchildren's exposure to $PM_{1.0-2.5}$ based on their school origin.                                                                                          |
|                             |                      | Mann-Whitney test   | Comparison of schoolchildren's exposure to $PM_{1.0-2.5}$ between participants in urban schools and participants in suburban schools.                                            |

**Table S3.** General Characteristics of schoolchildren from five observed schools.

| Characteristics                    | U1               |       | U2                |        | U3                 |        | SU1               |       | SU2              |        | Total        |              |                                                                            |
|------------------------------------|------------------|-------|-------------------|--------|--------------------|--------|-------------------|-------|------------------|--------|--------------|--------------|----------------------------------------------------------------------------|
|                                    | boys             | Girls | boys              | Girls  | boys               | Girls  | boys              | girls | boys             | girls  | boys         | girls        | all                                                                        |
| 7th grade (12-13 years old)        | 9                | 15    | 23                | 35     | 14                 | 34     | 26                | 45    | 12               | 23     | 84<br>35.6%  | 152<br>64.4% | 236<br>32.8%                                                               |
| 8th grade (13-14 years old)        | 20               | 39    | 25                | 55     | 77                 | 80     | 26                | 48    | 15               | 25     | 163<br>39.8% | 247<br>60.2% | 410<br>57.0%                                                               |
| 9th grade (14-15 years old)        | -                | 5     | 9                 | 9      | 15                 | 18     | 4                 | 7     | 1                | 5      | 29<br>39.7%  | 44<br>60.3%  | 73<br>10.2%                                                                |
|                                    | 29<br>88 (12.2%) | 59    | 57<br>156 (21.7%) | 99     | 106<br>238 (33.1%) | 132    | 56<br>156 (21.7%) | 100   | 28<br>81 (11.3%) | 53     | 276<br>38.4% | 443<br>61.6% | 719 children                                                               |
| <b>LIVING CONDITION</b>            |                  |       |                   |        |                    |        |                   |       |                  |        |              |              |                                                                            |
| <b>House location</b>              |                  |       |                   |        |                    |        |                   |       |                  |        |              |              |                                                                            |
| near roadside                      | 11               | 20    | 3                 | 13     | 11                 | 13     | 9                 | 17    | 4                | 4      | 38<br>36.2%  | 67<br>63.8%  | 105<br>14.6%                                                               |
| small road                         | 11               | 26    | 51                | 79     | 61                 | 81     | 31                | 60    | 11               | 13     | 165<br>43.2% | 259<br>67.8% | 424<br>59.0%                                                               |
| housing estate                     | 7                | 13    | 3                 | 7      | 34                 | 38     | 16                | 23    | 13               | 36     | 73<br>38.4%  | 117<br>61.6% | 190<br>26.4%                                                               |
| <b>Family members</b>              |                  |       |                   |        |                    |        |                   |       |                  |        |              |              |                                                                            |
| 3 - 5 ORANG                        | 21               | 40    | 40                | 67     | 76                 | 93     | 46                | 64    | 24               | 36     | 207<br>40.8% | 300<br>59.2% | 507<br>70.5%                                                               |
| 5 - 8 ORANG                        | 6                | 16    | 14                | 29     | 23                 | 35     | 10                | 31    | 4                | 17     | 57<br>30.8%  | 128<br>69.2% | 185<br>25.7%                                                               |
| > 8 ORANG                          | 2                | 3     | 3                 | 3      | 7                  | 4      | -                 | 5     | -                | -      | 12<br>44.4%  | 15<br>55.6%  | 27<br>3.8%                                                                 |
| <b>Smoking status</b>              |                  |       |                   |        |                    |        |                   |       |                  |        |              |              |                                                                            |
| Yes                                | 15               | 38    | 39                | 68     | 58                 | 56     | 38                | 63    | 20               | 38     | 170<br>39.3% | 263<br>60.7% | 433<br>60.2%                                                               |
| No                                 | 14               | 21    | 18                | 31     | 48                 | 50     | 18                | 37    | 8                | 15     | 106<br>40.8% | 154<br>59.2% | 260<br>36.2%                                                               |
| <b>Cooking hours/day</b>           |                  |       |                   |        |                    |        |                   |       |                  |        |              |              |                                                                            |
| 2-3 hours                          | 25               | 48    | 50                | 89     | 101                | 121    | 54                | 97    | 27               | 49     | 257<br>38.9% | 404<br>61.1% | 661<br>91.9%                                                               |
| 4-5 hours                          | 4                | 10    | 4                 | 10     | 3                  | 10     | 2                 | 2     | 1                | 4      | 14<br>28.0%  | 36<br>72.0%  | 50<br>7.0%                                                                 |
| more than 5 hours                  | -                | 1     | 3                 | -      | 2                  | 1      | -                 | 1     | -                | -      | 5<br>62.5%   | 3<br>37.5%   | 8<br>1.1%                                                                  |
| <b>TIME ACTIVITY DATA</b>          |                  |       |                   |        |                    |        |                   |       |                  |        |              |              |                                                                            |
| <b>Ways to school</b>              |                  |       |                   |        |                    |        |                   |       |                  |        |              |              |                                                                            |
| walking                            | 1                | 1     | 10                | 5      | 10                 | 5      | 4                 | 7     | -                | 2      | 25<br>5.7%   | 20<br>4.5%   | 45<br>6.3%                                                                 |
| motor vehicle                      | 19               | 42    | 41                | 6      | 10                 | 109    | 49                | 89    | 28               | 49     | 147<br>33.3% | 295<br>66.7% | 442<br>61.5%                                                               |
| car                                | 8                | 15    | 4                 | 84     | 82                 | 11     | 2                 | 4     | -                | 2      | 96<br>21.7%  | 116<br>26.2% | 212<br>29.5%                                                               |
| mass transportation                | 1                | 1     | 2                 | 4      | 4                  | 7      | 1                 | -     | -                | -      | 8<br>1.8%    | 12<br>2.7%   | 20<br>2.8%                                                                 |
| <b>Schooling (hours)</b>           | 4                | 4     | 4                 | 4      | 4                  | 4      | 4                 | 4     | 4                | 4      | 16.7%        | 16.7%        |                                                                            |
| <b>Home-school transit (hours)</b> | <1               | <1    | <1                | <1-1.5 | <1-1.5             | <1-1.5 | <1                | <1    | <1-1.5           | <1-1.5 | <4.2-6.3%    | <4.2-6.3%    | 70% at home,<br>16% in classrooms,<br>4% in commuting,<br>2.7% in outdoor. |
| <b>At home-living room (hours)</b> | 1-6              | 2-7   | 1-5               | 2-8    | 2-5.5              | 2-7    | 1-6               | 2-8   | 1-6              | 2-7    | 4.2-25.0%    | 8.3-33.3%    |                                                                            |
| <b>outside home (hours)</b>        | <1-3             | <1-2  | 1-2.5             | <1-2   | <1-3               | <1-2   | <1-3              | 1-2   | 1-3              | <1-2   | <4.2-12.5%   | <4.2-8.3%    |                                                                            |
| <b>At home-sleeping (hours)</b>    | 6-9              | 6-9   | 6-9               | 6-9    | 6-9                | 6-9    | 6-9               | 6-9   | 6-9              | 6-9    | 25.0-37.5%   | 25.0-37.5%   |                                                                            |
| <b>HEALTH STATUS</b>               |                  |       |                   |        |                    |        |                   |       |                  |        |              |              |                                                                            |
| <b>Weight (kg) (average)</b>       | 51.3             | 45.2  | 46.9              | 44.0   | 49.3               | 46.0   | 40.1              | 41.0  | 49.7             | 39.5   | 47.4         | 43.1         | 45.3                                                                       |
| <b>Height (cm) (average)</b>       | 158.5            | 156.2 | 154.8             | 154.3  | 158.2              | 156.1  | 144.1             | 153.7 | 154.4            | 142.3  | 154.0        | 152.5        | 153.3                                                                      |
| <b>BMI for children (average)</b>  | 20.4             | 18.5  | 19.6              | 18.5   | 19.7               | 18.9   | 19.3              | 17.3  | 20.9             | 19.5   | 20.0         | 18.5         |                                                                            |
| <b>Respiratory problem</b>         |                  |       |                   |        |                    |        |                   |       |                  |        |              |              |                                                                            |
| no                                 | 20               | 48    | 13                | 68     | 87                 | 117    | 49                | 77    | 21               | 20     | 190<br>38.9% | 330<br>67.5% | 520<br>72.3%                                                               |
| common cold                        | 3                | 3     | 5                 | 11     | 14                 | 4      | 3                 | 8     | 3                | 2      | 23<br>45.1%  | 28<br>54.9%  | 51<br>7.1%                                                                 |
| cough                              | 1                | -     | 1                 | 5      | 1                  | 2      | 1                 | 1     | -                | 5      | 4<br>23.5%   | 13<br>76.5%  | 17<br>2.4%                                                                 |
| cough and cold                     | 1                | 6     | 2                 | 4      | 3                  | 3      | 3                 | 5     | 1                | -      | 10<br>35.7%  | 18<br>64.3%  | 28<br>3.9%                                                                 |
| breathless                         | 4                | 2     | 3                 | 8      | 1                  | 6      | -                 | 9     | 3                | 3      | 11<br>28.2%  | 28<br>71.8%  | 39<br>5.4%                                                                 |
| <b>COVID-19 Symptoms</b>           |                  |       |                   |        |                    |        |                   |       |                  |        |              |              |                                                                            |
| no                                 | 20               | 47    | 54                | 29     | 86                 | 114    | 53                | 87    | 24               | 44     | 237<br>42.5% | 321<br>57.5% | 558<br>77.6%                                                               |
| ever                               | 9                | 12    | 3                 | 6      | 20                 | 18     | 3                 | 13    | 4                | 9      | 39<br>73.6%  | 58<br>109.4% | 97<br>13.5%                                                                |

**Table S4.** Time activity and microenvironments of schoolchildren participants during personal exposure sampling.

| School | Student | at home (hours) |                     |         |              | Total | transit (hours) |            | Total | School environments |                   | Total | Others |         | Total |
|--------|---------|-----------------|---------------------|---------|--------------|-------|-----------------|------------|-------|---------------------|-------------------|-------|--------|---------|-------|
|        |         | Living room     | Kitchen/dinner room | Bedroom | outside home |       | for schooling   | for others |       | classroom           | outside classroom |       | indoor | outdoor |       |
| U1     | 1       | 2               | 1.75                | 1.25    | 1            | 6     | 0.5             | 0          | 0.5   | 3                   | 1.5               | 4.5   | 0      | 0       | 0     |
|        | 2       | 1.75            | 4                   | 0.75    | 0            | 6.5   | 0.5             | 0          | 0.5   | 2.25                | 2.75              | 5     | 0      | 0       | 0     |
|        | 3       | 2.5             | 1.75                | 1       | 1.25         | 6.5   | 0.5             | 0          | 0.5   | 2.75                | 1.75              | 4.5   | 0      | 0       | 0     |
|        | 4       | 2.25            | 2.25                | 2       | 0            | 6.5   | 0.5             | 0.5        | 1     | 1.75                | 2.25              | 4     | 0      | 0       | 0     |
|        | 5       | 2.25            | 0.5                 | 2.75    | 2            | 7.5   | 0.75            | 0          | 0.75  | 2                   | 1.75              | 3.75  | 0      | 0       | 0     |
| U2     | 6       | 3.25            | 1.5                 | 1.25    | 0.5          | 6.5   | 1               | 0          | 1     | 2.5                 | 2                 | 4.5   | 0      | 0       | 0     |
|        | 7       | 1               | 2                   | 1.25    | 0            | 4.25  | 0.5             | 0          | 0.5   | 3                   | 0                 | 3     | 0      | 3       | 3     |
|        | 8       | 0.5             | 3                   | 1.5     | 1            | 6     | 0.25            | 0          | 0.25  | 5                   | 0.5               | 5.5   | 0      | 0       | 0     |
|        | 9       | 0.75            | 3                   | 3.25    | 0            | 7     | 0.5             | 0          | 0.5   | 2.75                | 0.75              | 3.5   | 0      | 0       | 0     |
|        | 10      | 0.75            | 4.5                 | 1       | 0.25         | 6.5   | 0.25            | 0.25       | 0.5   | 4                   | 0.25              | 4.25  | 0      | 0       | 0     |
|        | 11      | 1.5             | 2.5                 | 2       | 0            | 6     | 0.5             | 0          | 0.5   | 2.75                | 1.25              | 4     | 0      | 0       | 0     |
|        | 12      | 2               | 2                   | 2       | 0            | 6     | 0.25            | 0          | 0.25  | 1.25                | 1.75              | 3     | 1      | 0       | 1     |
|        | 13      | 1               | 3                   | 2       | 0            | 6     | 0.25            | 0          | 0.25  | 2.25                | 0.75              | 3     | 1      | 0       | 1     |
| U3     | 14      | 1.75            | 1.25                | 2       | 1            | 6     | 0.5             | 0.5        | 1     | 2                   | 3                 | 5     | 0      | 0       | 0     |
|        | 15      | 0.25            | 4                   | 1       | 0            | 5.25  | 0.25            | 0          | 0.25  | 3                   | 0.5               | 3.5   | 0      | 1       | 1     |
|        | 16      | 4.75            | 0.25                | 0       | 0            | 5     | 0.5             | 0          | 0.5   | 2.75                | 0.25              | 3     | 0      | 2       | 2     |
|        | 17      | 2.75            | 1.25                | 2.5     | 0            | 6.5   | 0.25            | 0.5        | 0.75  | 1.75                | 1.75              | 3.5   | 0      | 0       | 0     |
|        | 18      | 1.25            | 2.5                 | 2.25    | 1            | 7     | 0.25            | 0.75       | 1     | 4                   | 0                 | 4     | 0      | 0       | 0     |
|        | 19      | 1.5             | 0.5                 | 3       | 0            | 5     | 0.25            | 0.25       | 0.5   | 3                   | 0                 | 3     | 2      | 0       | 2     |
| SU1    | 20      | 0.75            | 1.5                 | 2.5     | 1.25         | 6     | 0.5             | 0.5        | 1     | 3.25                | 0.75              | 4     | 0      | 0       | 0     |
|        | 21      | 5               | 0                   | 1       | 0            | 6     | 0.5             | 0          | 0.5   | 3.5                 | 0                 | 3.5   | 1      | 0       | 1     |
|        | 22      | 2.25            | 2.5                 | 2       | 0            | 6.75  | 0.5             | 0          | 0.5   | 4.25                | 0.5               | 4.75  | 0      | 0       | 0     |
|        | 23      | 1.5             | 0.75                | 3       | 0.75         | 6     | 0.5             | 0.5        | 0.5   | 3.25                | 0.75              | 4     | 0      | 0       | 0     |
|        | 24      | 1.75            | 1.75                | 3       | 0            | 6.5   | 0.25            | 0.25       | 0.5   | 2.25                | 2.75              | 5     | 0      | 0       | 0     |
|        | 25      | 2.25            | 3                   | 1.25    | 0            | 6.5   | 1               | 0          | 1     | 2.75                | 2                 | 4.75  | 0      | 0       | 0     |
|        | 26      | 3.5             | 0.5                 | 2.5     | 0            | 6.25  | 0.5             | 0          | 0.5   | 3.75                | 0.25              | 4     | 0      | 0       | 0     |
|        | 27      | 1.25            | 0.75                | 3.75    | 0.25         | 6     | 0.75            | 0          | 0.75  | 4.75                | 0.25              | 5     | 0      | 0       | 0     |

*Continued...*

| School | Student | at home (hours) |                     |         |               | Total | transit (hours) |            | Total |           |                   | Total | Others |         | Total |
|--------|---------|-----------------|---------------------|---------|---------------|-------|-----------------|------------|-------|-----------|-------------------|-------|--------|---------|-------|
|        |         | Living room     | Kitchen/dinner room | Bedroom | Others (home) |       | for schooling   | for others |       | classroom | outside classroom |       | indoor | Outdoor |       |
| SU2    | 28      | 2.5             | 1.75                | 1.25    | 1.25          | 6.75  | 0.5             | 0          | 0.5   | 3         | 1.75              | 4.75  | 0      | 0       | 0     |
|        | 29      | 1.75            | 1.25                | 1.25    | 2.25          | 6.5   | 0.25            | 0.25       | 0.5   | 3.75      | 0.25              | 4     | 0      | 1       | 1     |
|        | 30      | 1.5             | 3                   | 1.5     | 1             | 7     | 0.25            | 0.5        | 0.75  | 2.5       | 1.75              | 4.25  | 0      | 3.75    | 0     |
|        | 31      | 2.25            | 0.75                | 2       | 2.25          | 7.25  | 0.75            | 0          | 0.75  | 4         | 0.5               | 4.5   | 0      | 0       | 0     |
|        | 32      | 1               | 0.5                 | 3.5     | 1             | 6     | 0.25            | 0.25       | 0.5   | 4         | 0.25              | 4.25  | 1.25   | 0       | 0     |
|        | 33      | 0               | 1.75                | 3.75    | 1.5           | 7     | 0.25            | 0          | 0.25  | 4         | 0.75              | 4.75  | 0      | 0       | 0     |
|        | 34      | 2               | 2                   | 0.75    | 0.5           | 5.25  | 0.25            | 0          | 0.25  | 3.5       | 0                 | 3.5   | 0      | 0       | 1     |
